# **Robert Solow and the Development of Growth Economics**



**Robert Solow  
and the Development  
of Growth Economics**

**Annual Supplement to Volume 41**  
*History of Political Economy*

**Edited by Mauro Boianovsky  
and Kevin D. Hoover**

Duke University Press  
Durham and London 2009

Copyright © 2009 by Duke University Press.  
Printed in the United States of America  
on acid-free paper. ISBN 978-0-8223-6727-7.  
This is the 2009 supplement to  
*History of Political Economy*, ISSN 0018-2702.

# Contents

The Neoclassical Growth Model and Twentieth-Century Economics 1  
MAURO BOIANOVSKY AND KEVIN D. HOOVER

## **Part 1. Growth Economics in the First Person**

Does Growth Have a Future? Does Growth Theory Have a Future?  
Are These Questions Related? 27  
ROBERT M. SOLOW

Reflections 35  
EDWIN BURMEISTER

## **Part 2. Origins of Growth Economics**

Some Swedish Stepping-Stones to Growth Economics 47  
MAURO BOIANOVSKY

Solow's 1956 Contribution in the Context  
of the Harrod-Domar Model 67  
HARALD HAGEMANN

A Nonlinear History of Growth and Cycle Theories 88  
LIONELLO F. PUNZO

Trevor Swan and the Neoclassical Growth Model 107  
ROBERT W. DIMAND AND BARBARA J. SPENCER

Dynamizing Stability 127  
MARCEL BOUMANS

### **Part 3. Spread and Consolidation**

More Cobwebs? Robert Solow, Uncertainty,  
and the Theory of Distribution 149

WILLIAM DARITY JR.

The Growing of Ramsey's Growth Model 161

PEDRO GARCIA DUARTE

James Tobin and Growth Theory:  
Financial Factors and Long-Run Growth 182

ROBERT W. DIMAND AND STEVEN N. DURLAUF

Solow and Growth Accounting:  
A Perspective from Quantitative Economic History 200

NICHOLAS CRAFTS

Solow in the Tropics 221

JOHN TOYE

The Solow Model, Poverty Traps, and the Foreign Aid Debate 241

BRIAN SNOWDON

Hotelling, Rawls, Solow: How Exhaustible Resources Came to Be  
Integrated into the Neoclassical Growth Model 263

GUIDO ERREYERS

### **Part 4. Endogenous Growth, the New Growth Economics**

Solovian and New Growth Theory from the Perspective  
of Allyn Young on Macroeconomic Increasing Returns 285

ROGER J. SANDILANDS

Endogenous Growth: Valuable Advance, Substantive Misnomer 304

WILLIAM J. BAUMOL

The Rise and Fall of Cross-Country Growth Regressions 315

STEVEN N. DURLAUF

The Solow Residual as a Black Box: Attempts at Integrating  
Business Cycle and Growth Theories 334

TIAGO MATA AND FRANCISCO LOUÇÃ

Contributors 356

Index 361
